# Supplementary material for: Parameterization of river incision models requires accounting for environmental heterogeneity: insights from the tropical Andes
Source: Copernicus journal article supplement (doi:10.5194/esurf-8-447-2020), 2020-06-03
Supplement: Supplementary file 2 [file esurf-8-447-2020-supplement.zip]

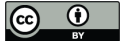

## *Supplement of*

# **Parameterization of river incision models requires accounting for environmental heterogeneity: insights from the tropical Andes**

**Benjamin Campforts et al.**

*Correspondence to:* Benjamin Campforts ([benjamin.campforts@gfz-potsdam.de](mailto:benjamin.campforts@gfz-potsdam.de))

- [esurf-8-447-2020-supplement-title-page.pdf](#)
- SI
  - [.DS\\_Store](#)
  - [SI Parameterization of river incision models requires accounting for environmental heterogeneity insights from the tropical Andes \\_revised.pdf](#)
  - [Table\\_S3.xlsx](#)
  - [Table\\_S4.xlsx](#)

The copyright of individual parts of the supplement might differ from the CC BY 4.0 License.
